# Supplementary material for: Membrane-Based Microwave-Mediated Electrochemical Immunoassay for the In Vitro, Highly Sensitive Detection of Osteoporosis-Related Biomarkers
Source: MDPI journal article supplement (doi:10.3390/s18092933), 2018-09-04
Supplement: s1 [file s1]

# Membrane-based microwave-mediated electrochemical immunoassay for the in vitro, highly sensitive detection of osteoporosis related biomarkers

Hye Youn Kim <sup>1</sup>, Shinobu Sato <sup>2</sup>, Shigeori Takenaka <sup>2</sup>, and Min-Ho Lee <sup>1,\*</sup>

<sup>1</sup> School of Integrative Engineering Chung-Ang University, 84 Heukseok-Ro, Dongjak-Gu, Seoul 06974, Korea;

<sup>2</sup> Department of Applied Chemistry, Research Center for Biomicrosensing Technology, Kyushu Institute of Technology, Fukuoka, 804-8550, Japan;

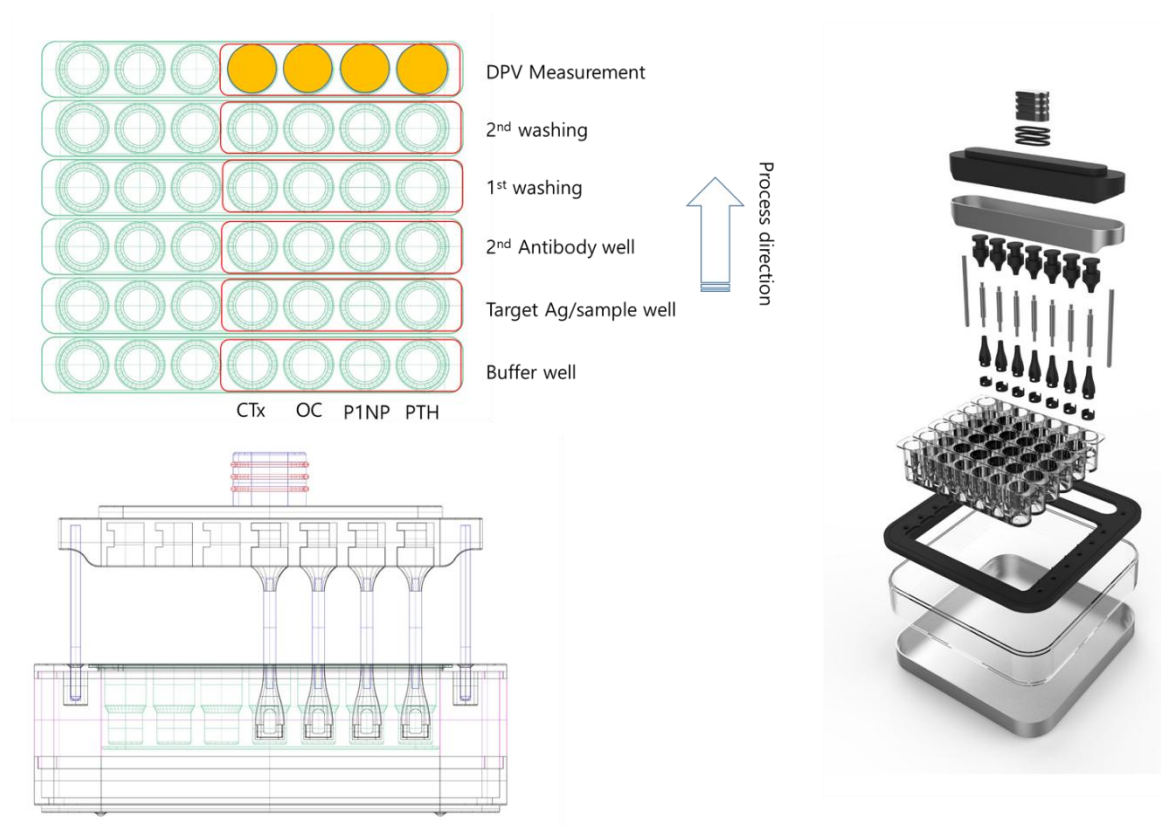

**Figure S1.** Custom-built 7 x 5 well type for the measurements. Upper left: well plate containing reaction solutions, lower left: membrane holders placed in the wells, right: assembling parts for the holder and plate.

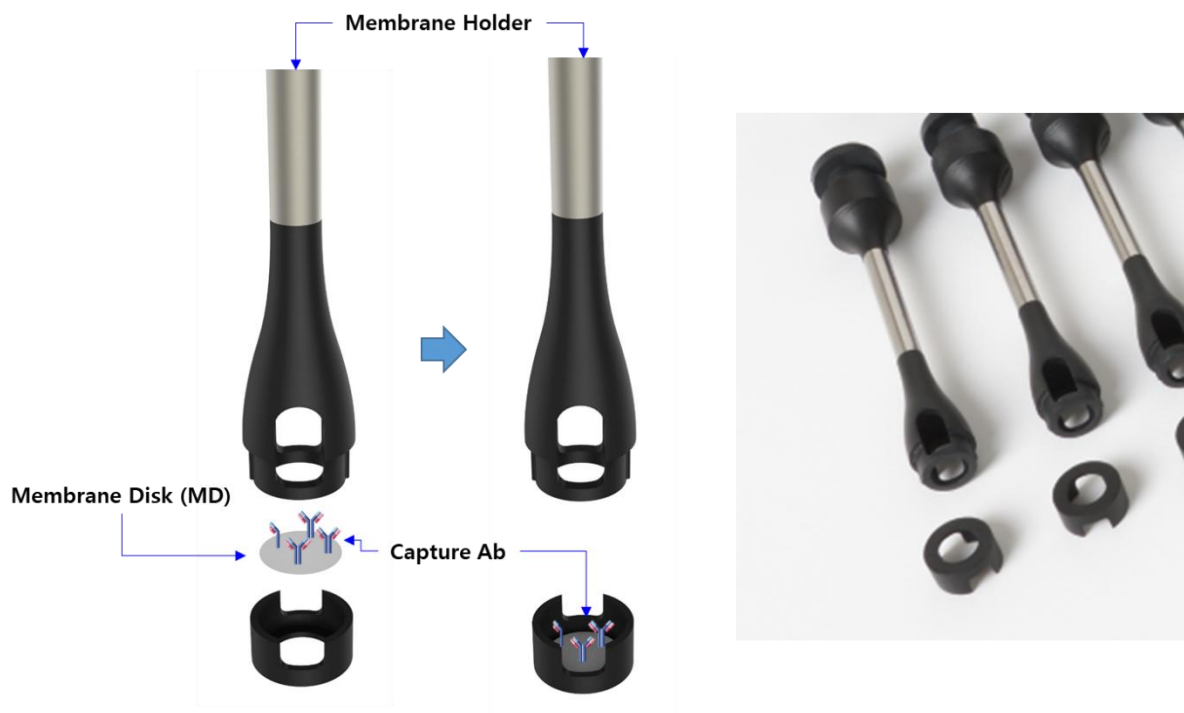

**Figure S2.** Custom-made membrane disk holder. Capture antibodies were immobilized on the MD and the MD were stationed between holder and its lid.

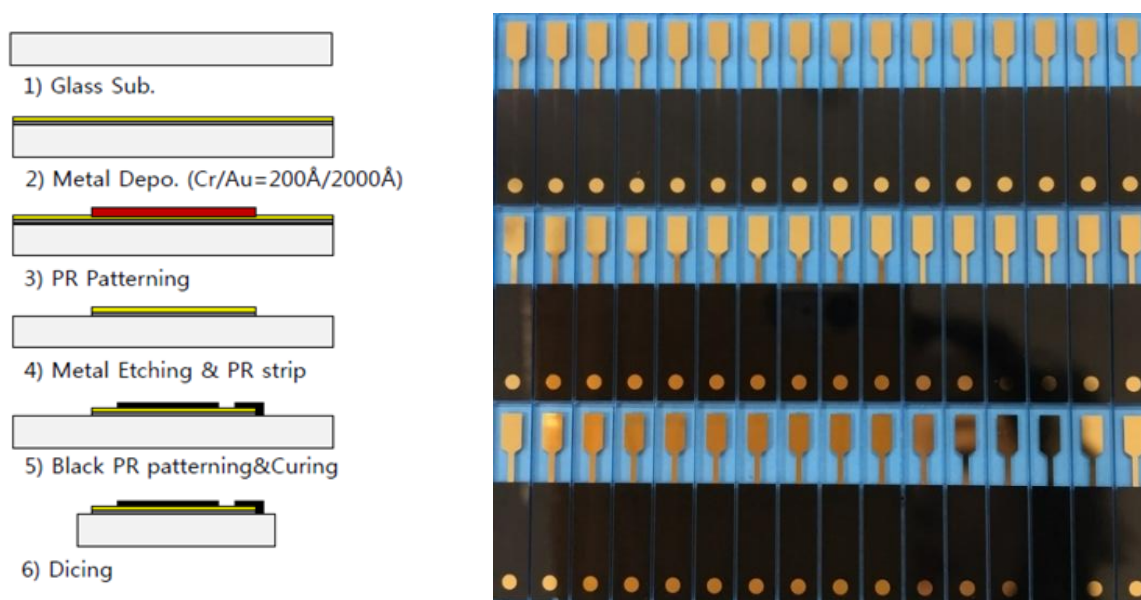

**Figure S3.** Fabrication process of electrodes (left) and the electrodes on glass wafer (right).
